# Supplementary material
Source: PubMed Central journal article supplement (PMC10199991)
Supplement: 40122_2023_492_MOESM1_ESM.pdf [file 40122_2023_492_MOESM1_ESM.pdf]

**Title**

COVID-19 Related Burning Eyes Syndrome and Burning Mouth Syndrome: A Systematic Review and Meta-analysis

**Authors**

Laura D Williams<sup>1</sup> (lauradawnwilliams98@gmail.com)

Panagiotis Zis<sup>1,2,3</sup> (takiszis@gmail.com)

**Affiliations**

1. Medical School, University of Sheffield, United Kingdom
2. Medical School, University of Cyprus, Nicosia, Cyprus
3. Second Department of Neurology, School of Medicine, Attikon University Hospital, National and Kapodistrian University of Athens, Athens, Greece

**Corresponding Author**

Panagiotis Zis ([takiszis@gmail.com](mailto:takiszis@gmail.com))

**Key words**

Burning eyes, Burning mouth, COVID, long-COVID

| Year | Study                      | Was the study's target population a close representation of the national population in relation to relevant variables, e.g. age, sex, occupation? | Was the sampling frame a true or close representation of the target population? | Was some form of random selection used to select the sample, OR, was a census undertaken? | Was the likelihood of non-response bias minimal? | Were data collected directly from the subjects (as opposed to a proxy)? | Was an acceptable case definition used in the study? | Was the study instrument that measured the parameter of interest (e.g. prevalence of low back pain) shown to have reliability and validity (if necessary)? | Was the same mode of data collection used for all subjects? | Were the numerator(s) and denominator(s) for the parameter of interest appropriate? | Summary on the overall risk of study bias | Outcome        |
|------|----------------------------|---------------------------------------------------------------------------------------------------------------------------------------------------|---------------------------------------------------------------------------------|-------------------------------------------------------------------------------------------|--------------------------------------------------|-------------------------------------------------------------------------|------------------------------------------------------|------------------------------------------------------------------------------------------------------------------------------------------------------------|-------------------------------------------------------------|-------------------------------------------------------------------------------------|-------------------------------------------|----------------|
| 2022 | Muthyam et al, 2022        | 1                                                                                                                                                 | 0                                                                               | 1                                                                                         | 0                                                | 0                                                                       | 0                                                    | 1                                                                                                                                                          | 0                                                           | 1                                                                                   | 4                                         | Moderate-Risk  |
| 2020 | Sinjari et al, 2020        | 0                                                                                                                                                 | 0                                                                               | 1                                                                                         | 0                                                | 0                                                                       | 0                                                    | 1                                                                                                                                                          | 0                                                           | 0                                                                                   | 2                                         | Low-Risk       |
| 2021 | Vallejo-Garcia et al, 2021 | 0                                                                                                                                                 | 1                                                                               | 1                                                                                         | 0                                                | 0                                                                       | 0                                                    | 0                                                                                                                                                          | 0                                                           | 1                                                                                   | 3                                         | Low-Risk       |
| 2022 | Shaikh et al, 2022         | 1                                                                                                                                                 | 1                                                                               | 0                                                                                         | 0                                                | 0                                                                       | 0                                                    | 0                                                                                                                                                          | 0                                                           | 1                                                                                   | 3                                         | Low-Risk       |
| 2021 | Rokohl et al, 2021         | 0                                                                                                                                                 | 1                                                                               | 1                                                                                         | 1                                                | 0                                                                       | 0                                                    | 0                                                                                                                                                          | 0                                                           | 1                                                                                   | 4                                         | Moderate- Risk |
| 2020 | Meduri et al, 2020         | 1                                                                                                                                                 | 1                                                                               | 1                                                                                         | 0                                                | 0                                                                       | 0                                                    | 0                                                                                                                                                          | 0                                                           | 1                                                                                   | 4                                         | Moderate- Risk |
| 2021 | Sehgal et al, 2021         | 0                                                                                                                                                 | 1                                                                               | 0                                                                                         | 0                                                | 0                                                                       | 0                                                    | 0                                                                                                                                                          | 0                                                           | 0                                                                                   | 1                                         | Low-Risk       |
